# Aberrant regulation of a poison exon caused by a non-coding variant in *Scn1a*-associated epileptic encephalopathy

Yuliya Voskobiynyk<sup>1,2</sup>, Gopal Battu<sup>1,3</sup>, Stephanie A. Felker<sup>3</sup>, J. Nicholas Cochran<sup>3</sup>,

Megan P. Newton<sup>4</sup>, Laura Lambert<sup>4</sup>, Robert A. Kesterson<sup>4</sup>, Richard M. Myers<sup>3</sup>, Gregory M. Cooper<sup>3</sup>,

Erik D. Roberson<sup>2</sup>, Gregory S. Barsh<sup>3</sup>

## Abstract

Dravet syndrome (DS) is a developmental and epileptic encephalopathy that results from mutations in the Na<sub>v</sub>1.1 sodium channel encoded by *SCN1A*. Most known DS-causing mutations are in coding regions of *SCN1A*, but we recently identified several disease-associated *SCN1A* mutations in intron 20 that are within or near to a cryptic and evolutionarily conserved “poison” exon, 20N, whose inclusion leads to transcript degradation. However, it is not clear how these intron 20 variants alter *SCN1A* transcript processing or DS pathophysiology in an organismal context, nor is it clear how exon 20N is regulated in a tissue-specific and developmental context. We address those questions here by generating an animal model of our index case, NM\_006920.4(*SCN1A*):c.3969+2451G>C, using gene editing to create the orthologous mutation in laboratory mice. *Scn1a* heterozygous knock-in (+/*KI*) mice exhibited an ~50% reduction in brain *Scn1a* mRNA and Na<sub>v</sub>1.1 protein levels, together with characteristics observed in other DS mouse models, including premature mortality, seizures, and hyperactivity. In brain tissue from adult *Scn1a* +/+ animals, quantitative RT-PCR assays indicated that ~1% of *Scn1a* mRNA included exon 20N, while brain tissue from *Scn1a* +/*KI* mice exhibited an ~5-fold increase in the extent of exon 20N inclusion. We investigated the extent of exon 20N inclusion in brain during normal fetal development in RNA-seq data and discovered that levels of inclusion were ~70% at E14.5, declining progressively to ~10% postnatally. A similar pattern exists for the homologous sodium channel Na<sub>v</sub>1.6, encoded by *Scn8a*. For both genes, there is an inverse relationship between the level of functional transcript and the extent of poison exon inclusion. Taken together, our findings suggest that poison exon usage by *Scn1a* and *Scn8a* is a strategy to regulate channel expression during normal brain development, and that mutations recapitulating a fetal-like pattern of splicing cause reduced channel expression and epileptic encephalopathy.

Correspondence to Gregory Barsh ([gbarsh@hudsonalpha.org](mailto:gbarsh@hudsonalpha.org) | [hudsonalpha.org/faculty/greg-barsh](http://hudsonalpha.org/faculty/greg-barsh) | [@GregBarsh](https://twitter.com/GregBarsh) )

Correspondence to Erik Roberson ([eroberson@uabmc.edu](mailto:eroberson@uabmc.edu) | [robersonlab.net](http://robersonlab.net) | [@RobersonLabUAB](https://twitter.com/RobersonLabUAB) )

## Author Summary

Dravet syndrome (DS) is a neurological disorder affecting approximately 1:15,700 Americans[1]. While most patients have a mutation in the *SCN1A* gene encoding Na<sub>v</sub>1.1 sodium channels, about 20% do not have a mutation identified by exome sequencing. Recently, we identified variants in intron 20N, a noncoding region of *SCN1A*, in some DS patients [2]. We predicted that these variants alter *SCN1A* transcript processing, decrease Na<sub>v</sub>1.1 function, and lead to DS pathophysiology via inclusion of exon 20N, a “poison” exon that leads to a premature stop codon. In this study, we generated a knock-in mouse model, *Scn1a*+/*KI*, of one of these variants, NM\_006920.4(*SCN1A*):c.3969+2451G>C, which resides in a genomic region that is extremely conserved across vertebrate species. We found that *Scn1a*+/*KI* mice have reduced levels of *Scn1a* transcript and Na<sub>v</sub>1.1 protein and develop DS-related phenotypes. Consistent with the poison exon hypothesis, transcripts from brains of *Scn1a*+/*KI* mice showed elevated rates of *Scn1a* exon 20N inclusion. Since *Scn1a* expression in the brain is regulated developmentally, we next explored the developmental relationship between exon 20N inclusion and *Scn1a* expression. During normal embryogenesis, when *Scn1a* expression was low, exon 20N inclusion was high; postnatally, as *Scn1a* expression increased, there was a corresponding decrease in exon 20N usage. Expression of another voltage-gated sodium channel transcript, *Scn8a* (Na<sub>v</sub>1.6), was similarly regulated, with inclusion of a poison exon termed as 18N early in development when *Scn8a* expression was low, followed by a postnatal decrease in exon 18N inclusion and corresponding increase in *Scn8a* expression. Together, these data demonstrate that poison exon inclusion is a conserved mechanism to control sodium channel expression in the brain, and that an intronic mutation that disrupts the normal developmental regulation of poison exon inclusion leads to reduced Na<sub>v</sub>1.1 and DS pathophysiology.

<sup>1</sup>Contributed equally

<sup>2</sup>Center for Neurodegeneration and Experimental Therapeutics, Alzheimer’s Disease Center, and Evelyn F. McKnight Brain Institute, Departments of Neurology and Neurobiology, University of Alabama at Birmingham, Birmingham, AL 35233, U.S.A.

<sup>3</sup>HudsonAlpha Institute for Biotechnology, Huntsville, AL 35806, U.S.A.

<sup>4</sup>Department of Genetics, University of Alabama at Birmingham, Birmingham, AL 35233, U.S.A.

## Introduction

Dravet syndrome (DS) is a developmental and epileptic encephalopathy (DEE) characterized by intractable seizures, developmental delay, speech impairment, ataxia, hypotonia, sleep disturbances, and other health problems [3]. In the U.S., DS incidence is 1 per 15,700 [1], and 73% of patients die before the age of 10 years [4].

The most frequent cause of DS are loss-of-function mutations of *SCN1A*, which encodes the type I voltage-gated sodium channel (Na<sub>v</sub>1.1) alpha subunit, part of a larger family of nine sodium channel proteins (Na<sub>v</sub>1.1 – Na<sub>v</sub>1.9) that control neuronal excitability [5]. Pathogenic *SCN1A* mutations are generally heterozygous and often occur *de novo* in DS. DS-associated *SCN1A* mutations lead to a loss of Na<sub>v</sub>1.1, which is predominantly expressed in inhibitory GABAergic interneurons, so loss of function leads to network disinhibition [6]. Importantly, the molecular mechanisms for Na<sub>v</sub>1.1 loss of function differ between various *SCN1A* mutations; many cause nonsense-mediated RNA decay, while other missense mutations affect Na<sub>v</sub>1.1 stability or function [5].

Only 80% of DS patients have pathogenic *SCN1A* variants detectable within coding exons [7], suggesting that variants in noncoding regions near *SCN1A* may contribute to disease in some patients. A genomic analysis of 640

DEE patients found that five patients harbored rare variants predicted to be deleterious within a highly conserved region deep within *SCN1A* intron 20 [2]. A 64-bp segment within this region can be alternatively spliced and included as an exon termed 20N [2]. Exon 20N is known as a poison exon because it leads to a truncated and presumably nonfunctional *SCN1A* isoform due to a stop codon that arises with the frameshift caused by the 64-bp inclusion [8]. Several of the intron 20 variants identified in DEE patients increased inclusion of poison exon 20N in splice reporter assays in non-neuronal cells [2]. As a result, variant-induced aberrant inclusion of *SCN1A* poison exon 20N has been proposed as a mechanism for Na<sub>v</sub>1.1 loss of function in DEE patients [2].

Our prior work on non-coding variation and poison exon inclusion in DS was carried out in non-neuronal cultured cells with artificial constructs and did not determine if any of the non-coding variants could recapitulate the phenotype of DS in an organismal context. Here, we report the construction and analysis of a mouse model for a *SCN1A* variant, NM\_006920.4(*SCN1A*):c.3969+2451G>C (hereafter, c.3969+2451G>C), that we identified in our index patient and that lies within the alternatively spliced poison exon, 20N. [2]. Our results provide rigorous evidence of causality for a non-coding variant, allow direct measurement

of poison exon usage *in vivo*, and give new insight into the normal function of poison exons for sodium channel genes and the consequent relationship to human genetic disease.

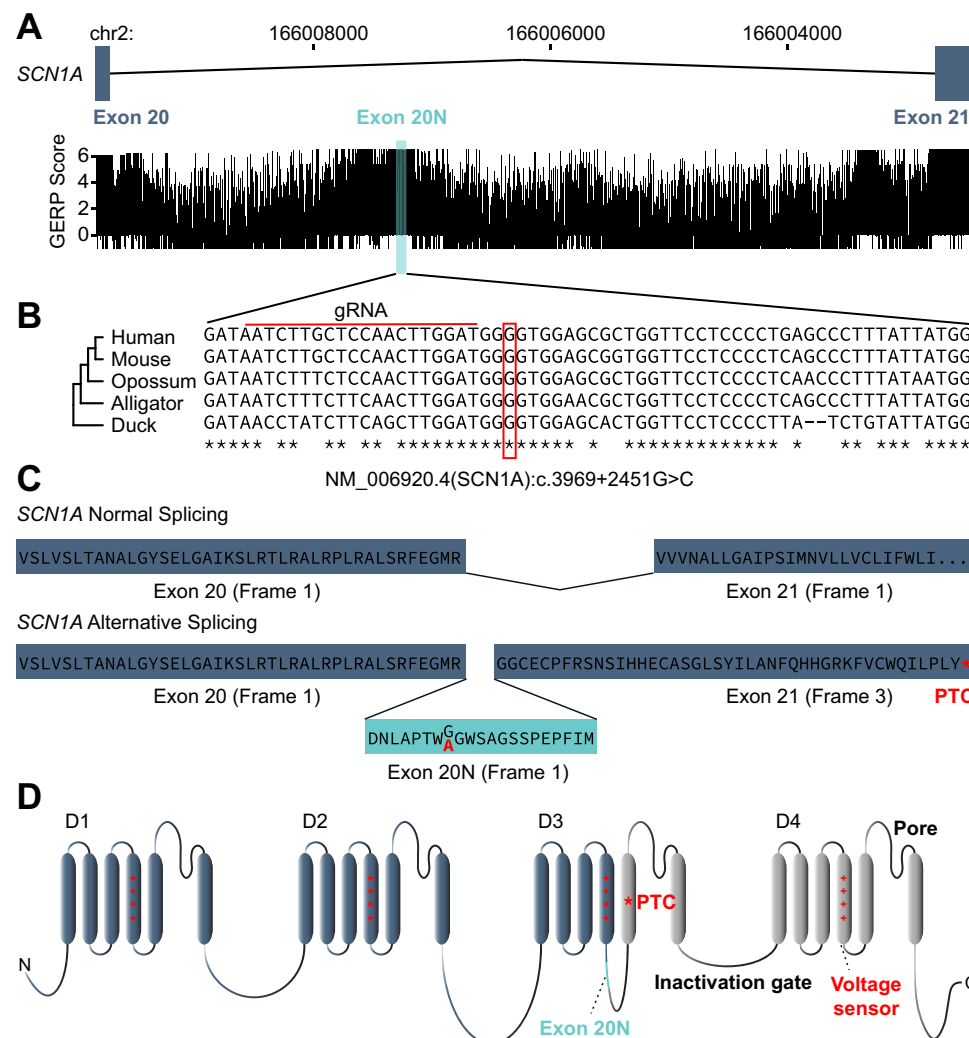

**Figure 1. The non-coding Dravet Syndrome-causing variant, NM\_006920.4(*SCN1A*):c.3969+2451G>C, is present in a highly conserved region.**

(A) The alternate exon 20N (shaded rectangle) is highly conserved, with GERP scores that are comparable to canonical exons in *SCN1A*. (B) Multiple alignment in the 64bp *SCN1A* 20N region of human, mouse, opossum, alligator, and duck, modified from the Multiz Alignment of 100 Vertebrates track from the UCSC Genome Browser (SFig.1). The red box indicates the position of the variant NM\_006920.4(*SCN1A*):c.3969+2451G>C in our index patient. The red line indicates the position of the guide RNA used for CRISPR/Cas9 gene editing. (C) Alternative splicing of intron 20 in *SCN1A*. Inclusion of exon 20N (bottom) results in a frame shift and hence a premature termination codon (PTC) in exon 21. The NM\_006920.4(*SCN1A*):c.3969+2451G>C also results in a Gly-Ala (red) substitution within exon 20N. (D) Exon 20N would be in the intracellular loop connecting the fourth and fifth transmembrane voltage sensing regions of the third *SCN1A* homologous domain (D3) but brings a premature termination codon (PTC) in frame resulting in nonsense-mediated RNA decay.

## Results

**Evolutionary conservation in intronic regions harboring a DS-causing variant.** We first examined evolutionary conservation in the region surrounding the *SCN1A* intron 20 pathogenic variant that we studied here, c.3969+2451G>C, as a prerequisite to identifying the orthologous variant in mice. Human intron 20 is ~ 8 kb, within which there exist three highly conserved segments of several hundred nucleotides in length (Fig. 1A). Exon 20N and the surrounding region is highly conserved as indicated by quantitative assessment with genomic evolutionary rate profiling (GERP) (Fig. 1B) and alignment across 77 vertebrates (S1 Fig.). The G>C substitution in our index patient lies within exon 20N and is perfectly conserved along with neighboring nucleotides in the mouse. *SCN1A* transcripts that contain this exon 20N are “poisoned” due to a frameshift and consequent premature termination codon in exon 21 (Fig. 1C-D); the same is true for mouse *Scn1a*.

***Scn1a* mRNA and protein levels are reduced in the brains of *Scn1a* +/KI mice.** We used CRISPR/Cas9 gene editing [9] to generate mice harboring the c.3969+2451G>C variant on a C57BL/6J background. A guide RNA located upstream of the variant position (Fig. 1B) was used to produce a G>C single nucleotide substitution at the corresponding position in mouse *Scn1a*, NC\_000068.7:g.66293870C>G (GRCm38.p6) (Fig. 2A). All genotypes were confirmed by Sanger sequencing. Animals carrying one allele of the edited variant are termed *Scn1a* +/KI and compared to non-mutant *Scn1a* +/+ littermates.

In cortical tissue from postnatal *Scn1a* +/KI mice, qRT-PCR for an amplicon between exons 19 and 20 (Materials and Methods) indicated an ~50% reduction in levels of *Scn1a* mRNA (Fig. 2B). Analysis of RNA-seq data from +/+ and +/KI animals yielded a similar result (Fig. 2C). We assessed Na<sub>v</sub>1.1 protein levels with antisera targeting C-terminal or N-terminal epitopes; in both cases, levels of full-length protein (260 kDa) was reduced by ~

50% (Fig. 2D-I), and there was no evidence of a truncated protein (157 kDa) that would otherwise correspond to the protein predicted from a transcript that contains exon 20N (S2 Fig. A). Taken together, these results indicate that the variant we introduced into *Scn1a* leads to the absence of Na<sub>v</sub>1.1, likely due to nonsense-mediated decay of a transcript that contains exon 20N and a downstream premature termination codon.

***Scn1a* +/KI mice exhibit Dravet syndrome-like phenotypes.** A number of *SCN1A* mutant mouse models have been described previously as models for DS [10-15]. As in patients with DS [16] and prior reports in other DS mouse models [10, 11, 17-21], *Scn1a*+/KI mice exhibited increased premature mortality compared to *Scn1a*+/+ littermates, with about 40% mortality at 3 months and 55% mortality between birth and 18 months (Fig. 3A). These figures include only deaths after weaning at P21, when genotypes were obtained. We also noted high mortality rates in these litters prior to weaning and genotyping, so overall premature mortality rates

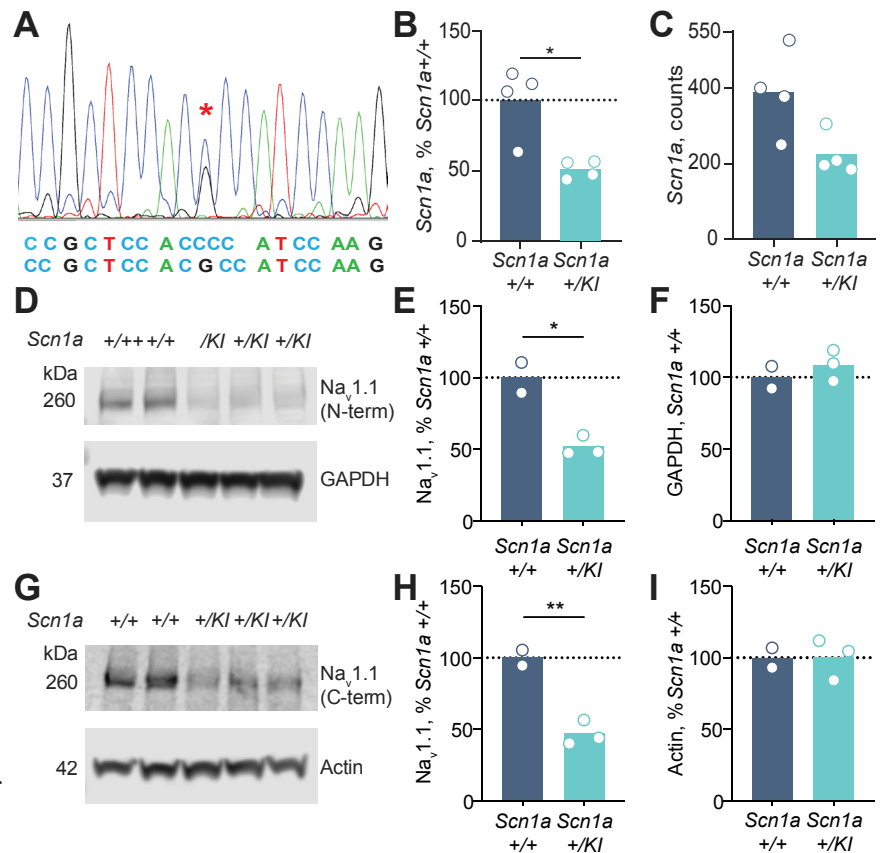

**Figure 2. *Scn1a* mRNA and Na<sub>v</sub>1.1 protein levels are reduced in *Scn1a*+/KI mice.** (A) Sanger sequence confirmation of *Scn1a*+/KI mouse with the gene-edited intron 20 G>C variant. (B) Brain mRNA levels in *Scn1a*+/+ and *Scn1a*+/KI mice using qRT-PCR. Relative expression of *Scn1a* vs. the control gene *Tbp* ( $n = 4$ ,  $11.64 \pm 2.90$  months, Student’s unpaired t-test,  $p = 0.0251$ ). *Scn1a*+/KI mice have ~50% less *Scn1a* mRNA than *Scn1a* +/+ mice. (C) RNA-seq counts (normalized to sequencing library size by DESeq2) of *Scn1a* mRNA in whole brains of *Scn1a*+/+ and *Scn1a*+/KI mice ( $n = 4$ ,  $11.64 \pm 2.90$  months, Student’s unpaired t-test,  $p = 0.0541$ ). *Scn1a*+/KI mice have about 42% less *Scn1a* mRNA than *Scn1a*+/+ mice. (D) Levels of Na<sub>v</sub>1.1, the sodium channel encoded by *Scn1a*, are reduced in frontal cortex of *Scn1a*+/KI vs. *Scn1a*+/+ mice using rabbit anti-Na<sub>v</sub>1.1 antibody from Alomone Labs, which recognizes an N-terminal epitope. GAPDH served as a loading control. (E) Quantification of Na<sub>v</sub>1.1 levels from the blot in D ( $n = 2-3$ ,  $17.7 \pm 0.96$  months, Student’s unpaired t-test,  $p = 0.0142$ ). (F) Quantification GAPDH protein levels from the blot in D ( $n = 2-3$ ,  $17.7 \pm 0.96$  months, Student’s unpaired t-test,  $p = 0.4459$ ). (G) Na<sub>v</sub>1.1 levels using anti-Na<sub>v</sub>1.1 Antibodies Incorporated antibody, which recognizes a C-terminal epitope. Actin served as a loading control. (H) Quantification of Na<sub>v</sub>1.1 protein levels from the blot in G ( $n = 2-3$ ,  $17.7 \pm 0.96$  months, Student’s unpaired t-test,  $p = 0.0059$ ). (I) Quantification of actin protein levels from the blot in E ( $n = 2-3$ ,  $17.7 \pm 0.96$  months, Student’s unpaired t-test,  $p = 0.9859$ , respectively). \* $p < 0.05$  and \*\* $p < 0.01$ .

are likely even higher than these estimates. We frequently observed spontaneous seizures in *Scn1a* *+/-KI* mice (video in Supplementary File 1) and the mice did not show signs of declining health, so the premature mortality is likely caused by seizure events incompatible with survival. Further, we never observed homozygous *Scn1a* *KI/KI* mice from *Scn1a* *+/-KI* to *Scn1a* *+/-KI* intercrosses, suggesting early lethality for homozygosity of this allele, again consistent with other DS mouse models.

We tested *Scn1a* *+/-KI* mice that survived to adulthood in a battery of behavior assays [22-25] to investigate if they developed behavioral deficits reported in other DS mouse models [26, 27]. Consistent with phenotypes of other DS models [22, 28], *Scn1a* *+/-KI* mice exhibited hyperactivity in the open field (**Fig. 3B-F**), including increased distance travelled (**Fig. 3B-C**) and jumps (**Fig. 3D**). Notably, percent time in the center of the open field and stereotypic counts were similar in *Scn1a* *+/-KI* mice compared to *Scn1a* *+/+* mice (**Fig. 3E-F**), indicating no apparent evidence

other DS mouse models. Taken together with the molecular characterization (**Fig. 2**), these results demonstrate that the mouse models the molecular pathophysiology of a conserved non-coding mutation in exon 20N and provides compelling evidence of its pathogenicity in DS.

**Retention of exon 20N in *Scn1a* *+/-KI* mice.** We designed several qPCR primer sets to detect mRNA transcripts either containing or excluding exon 20N (**Fig. 4A**), after reverse transcription with random primers (Materials and Methods). Amplicon 1 spans from exon 20 to exon 21 and generates a 56-bp product without exon 20N or a 120-bp product when exon 20N is included. In RNA from cortex of animals aged 1.9 mo – 19 mo, levels of the larger transcript reflecting exon 20N inclusion were undetectable in *Scn1a* *+/+* mice, but easily detectable in *Scn1a* *+/-KI* mice (**Fig. 4B-C**). A second set of primers spans the introns between exons 20 and 20N, and between exons 20N and 21, allowing measurement of exon 20N-containing transcripts as a 96 bp

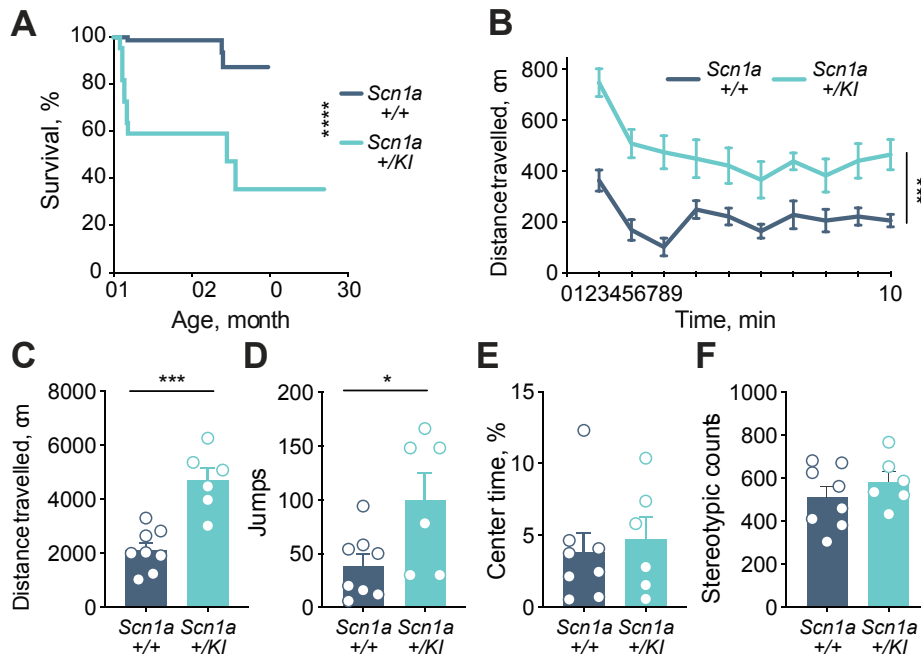

**Figure 3. *Scn1a* *+/-KI* mice exhibit premature mortality and a hyperactivity phenotype.** (A) Kaplan-Meier analysis showed severe premature mortality in *Scn1a* *+/-KI* mice ( $n = 22-93$ , Log-rank (Mantel-Cox) test,  $p < 0.0001$ ). This analysis started at weaning, when genotyping was performed, and so does not include additional mortality observed in litters prior to weaning. (B) Distance travelled in the open field as a function of time is increased in *Scn1a* *+/-KI* mice ( $n = 6-8$ , 13.81  $\pm$  0.47 months, two-way RM-ANOVA, interaction  $p = 0.0150$ , main effects of time  $p < 0.0001$  and genotype  $p = 0.0003$ ). (C) Total distance travelled during 10 minutes in the open field is higher in *Scn1a* *+/-KI* mice ( $n = 6-8$ , 13.81  $\pm$  0.47 months, Student's unpaired t-test,  $p = 0.0003$ ). (D) Vertical jumps in the open field apparatus are higher in *Scn1a* *+/-KI* mice ( $n = 6-8$ , 13.81  $\pm$  0.47 months, Student's unpaired t-test,  $p = 0.0305$ ). (E) No difference between genotypes were found in stereotypic counts in the open field ( $n = 6-8$ , 13.81  $\pm$  0.47 months, Student's t-test,  $p = 0.3444$ ). (F) No difference between genotypes in percent time spent in the center of the open field ( $n = 6-8$ , 13.81  $\pm$  0.47 months, Student's unpaired t-test,  $p = 0.6598$ ). All data are expressed as mean  $\pm$  SEM; \* $p < 0.05$ , \*\*\* $p < 0.001$  and \*\*\*\* $p < 0.0001$ .

of increased anxiety. In addition, testing in an elevated plus maze, another behavioral assay for anxiety-related phenotypes, [24, 25, 29], revealed no differences in the time spent in open or closed arms, nor total entries into the open and closed arms of the maze (**S3A-C Fig**). In a Y-maze assay [24, 25, 30], no differences in spontaneous alternations were observed between *Scn1a* *+/+* and *+/-KI* mice (**S3D-E Fig**), indicating no apparent deficits in short-term memory. Lastly, *Scn1a* *+/-KI* mice did not show any behavioral deficits in the tube test of social dominance [31] (**S4A Fig**) or three-chamber sociability test [32] (**S4B-D Fig**). Overall, our results on DS-associated behavioral phenotypes in *Scn1a* *+/-KI* are similar to what has been reported previously in

product, amplicon 2, that can be directly compared to a 111 bp product, amplicon 3, that spans exons 19 and 20 (**Fig. 4A**). Expressed as a percentage of amplicon 2/amplicon 3, exon 20N is included in 0.97% of *Scn1a* transcripts in *+/+* mice, and in 4.8% of *Scn1a* transcripts in *+/-KI* mice (**Fig. 4D**). Similar results were obtained after reverse transcription with oligodT. Assuming an additive model in which the presence of the *KI* allele does not influence activity of the + allele, and vice versa, we conclude that gene-edited variant leads to a ~9 to 10-fold increase in *Scn1a* transcripts that contain exon 20N. We also note that the levels of normal *Scn1a* mRNA and protein are reduced ~50% in *+/-KI* compared to *+/+* mice (**Fig. 2**), which implies that nearly all

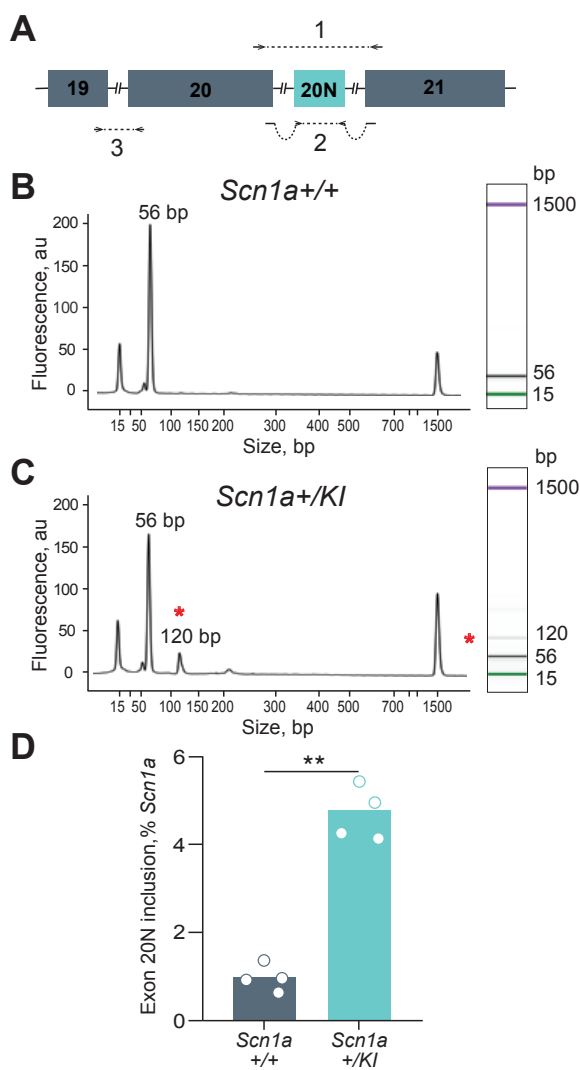

*KI* mice, respectively (Fig. 2C), but the number of reads that aligned to exon 20N were (0,0,1,0) and (0,0,0,0) in +/+ and +/*KI* mice, indicating that most transcripts that contain exon 20N are degraded.

#### Potential function of poison exons in *Scn1a* and *Scn8a*.

Aberrant regulation of poison exons as a pathogenetic mechanism, and conservation of that mechanism in humans and mice, raises the more general question of how and why *Scn1a* poison exons are used normally during development and differentiation. Voltage-gated sodium channels (Na<sub>v</sub>1.1–Na<sub>v</sub>1.9) have distinct developmental and regional patterns of expression [33–36]. Na<sub>v</sub>1.1, the alpha subunit encoded by *Scn1a*, rises after a lag phase to adult levels during the second to fourth postnatal weeks in both mouse and rat brains, and is expressed primarily in a subset of GABAergic interneurons [33–35]. The homologous protein Na<sub>v</sub>1.6, encoded by *Scn8a*, has a similar pattern of developmental expression to Na<sub>v</sub>1.1, but is expressed primarily in glutamatergic neurons. Previous work from Meisler and colleagues on *Scn8a* has identified a poison exon, 18N, whose expression is highest in fetal brain [37]. Inclusion of exon 18N in *Scn8a* is regulated by several RNA binding proteins [38, 39], and for which a “fail-safe” mechanism has been proposed to prevent the synthesis of active protein in cells or tissues where it would be deleterious. We explored that idea for *Scn1a* by first measuring expression of alternative isoforms in different tissues of +/+ and +/*KI* mice using isoform-specific amplicons as shown in Fig. 4A. In heart, kidney, liver, and lung of +/+ and +/*KI* mice, *Scn1a* was expressed at very low levels as detected by qRT-PCR (Table 1).

| Tissue | Genotype                  | <i>Scn1a</i> Ct | <i>Tbp</i> Ct | ΔCt  | 20N Ct |
|--------|---------------------------|-----------------|---------------|------|--------|
| Lung   | <i>Scn1a</i> +/+          | 35.6            | 22.7          | 12.9 | UD     |
|        | <i>Scn1a</i> +/ <i>KI</i> | 33              | 22.8          | 10.2 | 36.8   |
| Liver  | <i>Scn1a</i> +/+          | 36.9            | 23            | 13.9 | UD     |
|        | <i>Scn1a</i> +/ <i>KI</i> | UD              | 22.4          | -    | UD     |
| Kidney | <i>Scn1a</i> +/+          | 30.5            | 21.5          | 9    | 35.8   |
|        | <i>Scn1a</i> +/ <i>KI</i> | 31.1            | 21.8          | 9.3  | 35.2   |
| Heart  | <i>Scn1a</i> +/+          | 36.1            | 25.4          | 10.7 | UD     |
|        | <i>Scn1a</i> +/ <i>KI</i> | 34.6            | 24.9          | 9.7  | 38     |
| Brain  | <i>Scn1a</i> +/+          | 21.6            | 23.7          | -2.1 | 28.3   |
|        | <i>Scn1a</i> +/ <i>KI</i> | 22.5            | 23.8          | -1.3 | 27     |

**Table 1. *Scn1a* expression in various tissues.** Quantification of total *Scn1a* mRNA levels using amplicon “1” (Figure 3) in *Scn1a* +/+ and *Scn1a* +/*KI* mice (n=1). Low levels of *Scn1a* mRNA were expressed in lung, liver, kidney, and heart as evidenced by the high ΔCt values. *Tbp* was used to normalize *Scn1a* expression. UD= undetectable. Transcripts containing 20N (Amplicon “2” in Figure 3) were undetectable or barely detectable in tissues other than brain.

We did not have access to fetal tissues from *Scn1a* +/*KI* mice, but we analyzed usage of *Scn1a* exon 20N in non-mutant mice by analyzing a previously generated RNA-Seq dataset of mouse cortex at multiple developmental timepoints [40].

transcription from the *KI* allele contains exon 20N, and that ~95% of exon 20N-containing transcripts are degraded, likely by nonsense-mediated decay.

As an alternative approach to evaluating usage of exon 20N, we constructed and analyzed RNA-seq libraries from brain tissue of four *Scn1a* +/*KI* mice and four *Scn1a*+/*+* littermates. The number of reads that aligned to all *Scn1a* exons was 387.83 ± 56.49 and 223.24 ± 27.58 in +/+ and +/*Scn1a* poison exon inclusion in a mouse model of Dravet syndrome

Expressed as a proportion of reads that align to exon 20N compared to all other exons, ~70% of *Scn1a* transcripts include 20N at E14.5, gradually decreasing to <10% by P30, and remaining minimal throughout adult life (Fig. 5A). This pattern is inversely correlated with the overall level of *Scn1a* mRNA, inferred from the total number of reads (Fig. 5A). Thus, as exon 20N usage decreased, more *Scn1a* mRNA was produced, consistent with the poison exon inclusion being used to reduce *Scn1a* levels during development. We used the same dataset to evaluate usage of poison exon 18N in

*Scn8a* and observed a very similar pattern (Fig. 5B). This confirms the results of Meisler and colleagues [37], and suggests that poison exons for both sodium channel genes serve a similar function.

## Discussion

Here, we generated a knock-in mouse model of an intronic variant, previously identified as a *de novo* mutation in a patient with DS, to explore its effects on *Scn1a* expression and function *in vivo*. Introduction of this variant led to a

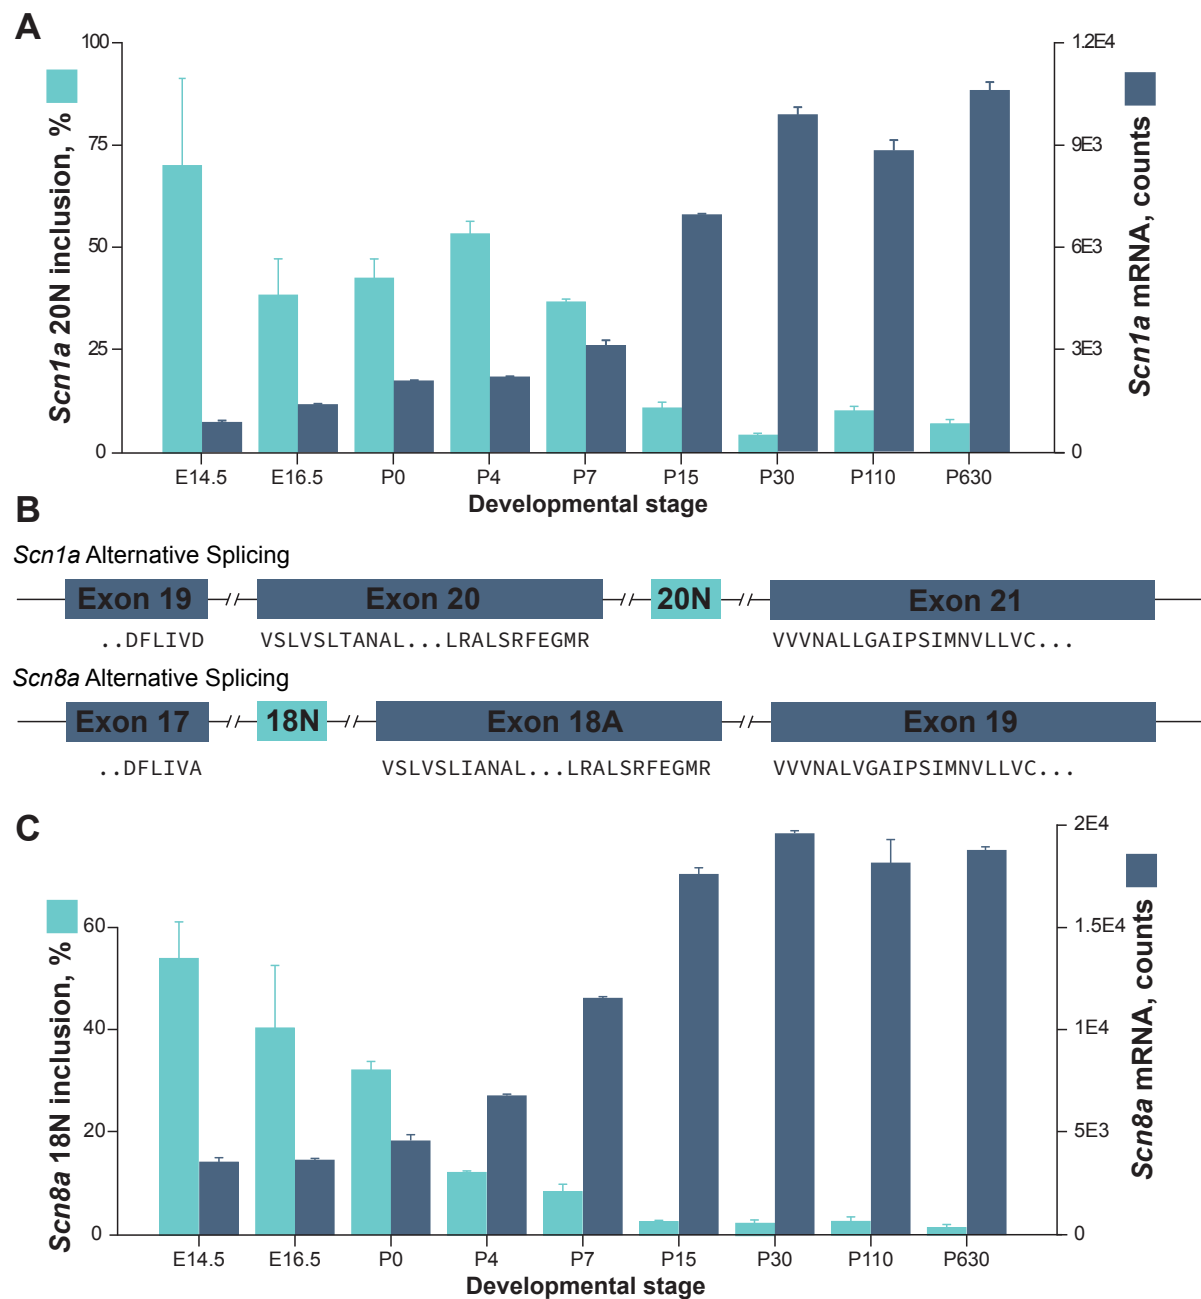

**Figure 5: Inverse relationship between poison exon usage and expression of multiple sodium channels during mouse brain development.** (A) *Scn1a* transcripts including exon 20N are highly expressed in the developing mouse brain and decrease dramatically after birth (aqua bars), with a corresponding developmental increase in *Scn1a* expression (blue bars). (B) The poison exon in *Scn8a* previously described by Plummer et al. (ref 38). *Scn1a* exon 20N and *Scn8a* exon 18N are 37.5% identical (57% in human), and the amino acid sequences shown at exon boundaries are identical between the two genes. The amino acid sequences shown are fully identical between mouse and human for both genes. (C) *Scn8a* transcripts including exon 18N are highly expressed in the developing mouse brain and decrease dramatically after birth (aqua bars), with a corresponding developmental increase in *Scn8a* expression (blue bars).

reduction in brain *Scn1a* mRNA and Na<sub>v</sub>1.1 protein levels, resulting in expression of DS-related phenotypes (Figs. 2–3, Supplementary File 1). Inclusion of poison exon 20N in adult brain from *Scn1a* *+/+* mice was ~1% and increased ~ fivefold in *+/KI* mice. Together with additional analyses and earlier work [37], our results suggest that poison exons in at least two neuronal sodium channels serve an important function in developmental regulation, suppressing expression of functional sodium channels until later stages of brain development. The mechanism is evolutionarily conserved and represents a previously unrecognized potential source of Mendelian disease.

Mutations in the *SCN1A* gene are the most common cause of DS, accounting for 80% of patients. While 20% of patients still do not have a definitive molecular diagnosis after exome sequencing, our previous results identified a number of variants in and around exon 20N in multiple patients with DS/DEE [2]. Our results provide compelling evidence for pathogenicity of the variant reported here and, by extension, additional variants that may enhance inclusion of exon 20N. Our *in vivo* finding that poison exon 20N inclusion leads to *Scn1a* loss of function explains how the phenotype of *Scn1a**+/KI* mice mimics that of other DS models, since reduced *Scn1a* expression is the common feature underlying DS. *Scn1a* loss of function results in decreased expression of Na<sub>v</sub>1.1, a voltage gated sodium channel responsible for promoting electrical excitability of neurons [41]. Loss-of-function *Scn1a* mutations would decrease neuronal activity. *Scn1a* is predominantly expressed in inhibitory GABAergic interneurons [12], so DS mutations decrease activity of the inhibitory circuitry and resulting disinhibition contributes to seizure generation [41].

Since there is no disease-modifying therapy for DS patients, better understanding the molecular pathogenesis in different families is critical. In terms of the intronic variant we studied, there is a growing list of therapeutic strategies that target mechanisms related to alternative splicing. An RNA-based therapeutic triggering poison exon inclusion in *DHX9*, a gene involved in Ewing sarcoma, has been exploited to enhance the efficacy of chemotherapy in cancer patients [42]. Additionally, targeting RNA splicing of *SMN2*, haploinsufficiency of which leads to spinal muscular atrophy (SMA), has led to the development of the first FDA-approved drug to treat SMA [43]. The *Scn1a**+/KI* mouse model we have developed based on patients with non-coding variants may provide support to assess poison exon 20N targeting therapeutics postnatally and other methods that may lead to an increased expression of Na<sub>v</sub>1.1.

In summary, our data indicate that poison exon inclusion is a conserved mechanism to suppress gene expression that is induced by an intronic mutation in *SCN1A* leading to DS. These findings deepen our understanding of the molecular genetic mechanisms leading to DS and provide a new mouse model for studying the effects of a novel

intronic mutation. Further, confirmation of the relevance of poison exon inclusion to a Mendelian disorder, coupled to the observation that multiple genes are regulated by this mechanism during development, suggests that variation affecting poison exons may be more broadly relevant to human disease.

## Materials and Methods

### Conservation Assessment

**GERP Analysis.** The pre-mRNA diagram constructed using the R package *ggbio* [44] [45] with coordinates obtained from the UCSC Genome Table Browser [46]. Conservation was analyzed across the region using GERP (Genomic Evolutionary Rate Profiling) conservation scores for each position [47]. Positive GERP scores reflect a high level of conservation, while negative GERP scores reflect a neutral rate of substitution at the region.

**Cross-species conservation analysis.** Multiple sequence alignments were retrieved from the Vertebrate Multiz Alignment & Conservation [48] (100 Species) track of the UCSC Genome Table Browser [46].

**Animals.** Mice were on a congenic C57BL/6J background. Mice were housed in a pathogen-free barrier facility on a 12-hour light/dark cycle with ad libitum access to water and food (NIH-31 Open Formula Diet, #7917, Harlan). Mice were genotyped by PCR from tail tissue collected at weaning and at death. Both male and female mice were used in experiments. Littermate siblings were used as controls in each experiment. Experiments were completed by blinded investigators. For postmortem analyses, mice were anesthetized by Fatal-plus (Vortech) and perfused with 0.9 % saline. Tissues were then removed, weighed, and dissected for processing as described below. All experimental protocols were approved by the Institutional Animal Care and Use Committee of the University of Alabama at Birmingham.

**Targeted CRISPR *Scn1a* *+/KI* Generation.** The CRISPR guide was generated using an online tool (<http://crispr.mit.edu>). A mouse carrying the NC\_000068.7:g.66293870C>G (GRCm38.p6) mutation was generated at the University of Alabama at Birmingham (UAB) Transgenic & Genetically Engineered Models Core (TGEMs). The reagents used were from Integrated DNA Technologies (IDT), Inc., Coralville, Iowa: Alt-R™ S.p. Cas9 Nuclease 3NLS (Cat # 1074181), Alt-R™ CRISPR tracrRNA (Cat#1072533), Alt-R™ CRISPR crRNA (sequence: 5'-TTGCTCCAACCTGGATGGGG-3'), single-stranded donor oligonucleotide (ssODN) (sequence: 5'-A\*C\*A\*TAAGTCACAGTGCAAGGATTAAGGTAGCAAAGGGGTAATACAGTACCCATAATAAAGGGCTGAGGGGAGGAACCGCTCCACgCCATCCAAGTTGGAGCAAGATTATCCTA

TATAAATAG\*A\*A\*A-3').

The Cas9 protein-crRNA-tracrRNA RNPs were assembled according to the manufacturer supplied instructions. Injections, manipulations of C57BL/6 embryos and subsequent maintenance of mice lines were carried out at the TGEMs facility using protocols and methods compliant with the University of Alabama at Birmingham Institutional Animal Care and Use Committee and the Guide for the Care and Use of Laboratory Animals published by the National Institutes of Health.

About 150 blastocysts were injected. Of these 28 F0 pups survived up to weaning and were genotyped for the engineered mutation. Six of these carried the mutation. Three of these were chosen for further crosses as these had the strongest peak for the changed base and therefore likely to have less mosaicism.

**Genotyping.** DNA from weaned mouse tails was prepared using the UAB Transgenic & Genetically Engineered Models Core Facility protocol: Tail clips were incubated at 65°C for 12 hours in lysis buffer (10mM Tris, 75mM NaCl, 25mM EDTA, 1% SDS, 0.5mg/ml Proteinase K) with intermittent shaking. DNA was extracted using Phenol:Chloroform, precipitated with ethanol, dried and resuspended in TE buffer. DNA was quantified using the ThermoFisher Qubit™ dsDNA HS Assay Kit (Q32854).

PCR was performed on tail clip DNA using NEB OneTaq DNA polymerase (M0480L) or NEB Phusion DNA Polymerase (M0530L) on an Applied Biosystems GeneAmp PCR System 9700. The following forward and reverse oligos were used to amplify and Sanger sequence the 327-bp target region: 5'-TGTCCTACTGTGGTGAAT-3' and 5'-CCCAAGCTGGGAAAATCGTAA-3'. Sanger sequencing was performed at Molecular Cloning Laboratories (MCLAB).

**Mouse tissue RNA extraction.** RNA was extracted from frozen *Scn1a*<sup>+/+</sup> and *Scn1a*<sup>+/-KI</sup> mouse tissues using the Norgen Biotek Corp Animal Tissue RNA purification kit (Cat # 25700) using the manufacturer supplied protocol. Genomic DNA contamination was reduced/eliminated using ThermoFisher TURBO DNA-free™ Kit (AM1907). RNA was quantified using ThermoFisher Qubit™ RNA BR Assay Kit (Q10211).

**cDNA Synthesis.** Random primed and oligo-dT primed cDNA was synthesized from total RNA using ThermoFisher SuperScript™ IV First-Strand Synthesis System (18091050) using the manufacturer supplied protocol. The Random primed cDNA was used for qPCR analyses.

**qPCR.** Quantitative PCR was performed on an Applied Biosystems QuantStudio 6 Flex using ThermoFisher PowerUp™ SYBR™ Green Master Mix (A25742). The

oligos were ordered from IDT Technologies after using their PrimerQuest oligo design tool. qPCR oligos were designed to amplify 3 amplicons. Amplicon 1 was amplified using the oligos 5'-CCCTAAGAGCCTTATCACGATTT-3' and 5'-TAACAGGGCATTCAACAACCA-3'. These were intron spanning oligos on exons 20 and 21 respectively. Amplicon 1 amplifies 2 products: A 56-bp product in transcripts without exon 20N or a 120bp product in transcripts with exon 20N. Amplicon 2 was amplified using the oligos 5'-CGATTTGAAGGGATGAGGGATAA-3' and 5' GCATTCACAACCACCCATAATAAA-3'. These exon-exon junction oligos span exons 20-20N and exons 20N-21 respectively. Amplicon 2 produces a 96-bp product only in the presence of 20N containing transcripts. Amplicon 3 was amplified using the oligos 5'-CTGGTGTTGGCTAGACTTCTT-3' and 5'-GCTCTTAGTGTCTTAGGGATTT-3'. These oligos are located on exons 19 and 20 respectively and amplify a 111-bp product.

Oligos for the housekeeping gene Tbp were ordered from IDT Technologies. Product # Mm.PT.39a.22214839.

Selected amplified DNA from the qPCR was analyzed on the Agilent 2100 Bioanalyzer using the Agilent DNA 1000 Kit (5067-1504).

**RNA-seq.** RNA-seq libraries were prepared from whole brain total RNA from 4 *Scn1a*<sup>+/+</sup> and 4 *Scn1a*<sup>+/-KI</sup> mice using the Lexogen QuantSeq 3' mRNA-Seq Library Prep Kit FWD for Illumina. Briefly, first strand cDNA was synthesized from total RNA using oligo dT oligo containing an Illumina Read 2 linker. Then, the template RNA was digested and 2nd strand synthesized using random primer containing Illumina Read 1 linker and Unique Molecular Identifiers (UMIs). The libraries were then amplified using Illumina index containing oligos. Single-end sequencing was done on an Illumina NextSeq. The reads generated were deduplicated using the UMIs. The RNA-seq reads were trimmed using Trim Galore (<https://github.com/FelixKrueger/TrimGalore>). The trimmed reads were aligned to the mouse genome build GRCh38.p6 using STAR aligner [49]. HTseq was used to generate counts for genes from the alignments [50]. *Scn1a* and *Gapdh* counts were extracted from the normalized table of counts in the R package DESeq2 [51].

**Western Blot.** Left frontal cortex was sub-dissected and was flash frozen on dry ice, and then homogenized in 100 ul of homogenization buffer containing 50 mM Tris, pH 7.5, 150 mM NaCl, 5 mM EDTA, 1 % TritonX-100, 0.1 % sodium deoxycholate, 1:100 Halt Protease Inhibitor (Halt, ThermoFisher, 78438) and Phosphatase inhibitor 3 (Sigma Aldrich, P0044). The homogenate was then centrifuged at 5,000 speed for 10 minutes. The supernatant (S1) was transferred into new Eppendorf tube after the centrifugation. The supernatant (S1) was centrifuged again at the same



conditions and the resulting supernatant (S2) was used to determine protein concentration using Bradford protein assay (Thermo Scientific, Pierce, Coomassie Plus (Bradford) Protein Assay, PI23238). Protein samples were prepared with 4x LDS (Life Technologies, NuPAGE LDS Sample Buffer (4X), NP0007) and 10x reducing agent (ThermoFisher, 10X Bolt Sample Reducing Agent, B0009), heated for 10 min at 70°C, then 10 µg were loaded and separated on 4–12% NuPage acrylamide gels (ThermoFisher, NuPAGE 10% Bis-Tris Midi Protein Gels, 26-well WG1203BOX) with NuPage MOPS running buffer for 1.5 h at constant 150 V. Next, proteins were transferred to Immobilon-FL PVDF membranes (Fisher, Millipore, SLGV033RS) using NuPage transfer buffer transfer system overnight at constant 30 V. The membrane was blocked in 50% Li-Cor Odyssey buffer (Li-Cor, 927-40000) in tris-buffered saline with 0.1% Tween (TBS-T) blocking buffer for 1 hour at room temperature and incubated with the appropriate primary antibody. The specific primary antibodies were diluted in 50% Odyssey blocking buffer in TBS-T as follows: anti-SCN1A (Na<sub>v</sub>1.1) (Alomone Labs, ASC-001, 1:1,000, overnight), anti-SCN1a (Na<sub>v</sub>1.1) (Antibodies Incorporated, 75-023, 1:1,000, overnight), anti-GAPDH (Millipore, MAB374, 1:5,000, 1hr), anti-Actin (Cell Signaling, 4967S, 1:1,000, 1hr). After primary antibody treatment, membranes were washed three times in TBS-T followed by incubation for 1 hour with Alexa Fluor 700- or 800- conjugated goat antibodies specific for mouse immunoglobulin G (1:20,000, Li-COR). Membranes were then washed three times in TBS-T, followed by a single wash in TBS, imaged on the LI-COR Odyssey fluorescence imaging system, and quantified using Li-CPR Image Studio.

**Behavioral Assessment.** For all behavioral tests, experiments were carried out during light cycle at least one hour after the lights came on. All mice were transferred to testing room for acclimation at least one hour prior to experiments. Testing apparatuses were cleaned by 75% ethanol between experiments and disinfected by 2% chlorohexidine after experiments were finished each day. All mice were tested in all the behavioral tests in the same order. Investigators were blind to the genotype of individual mouse at the time of experiment.

**Open Field.** Each mouse was placed into the corner of an open field apparatus (Med Associates) and allowed to walk freely for 10 minutes. Total and minute by minute ambulatory distance, jumps, stereotypic behavior counts, and percent time in center of each mouse were determined using the manufacturer's software.

**Elevated Plus Maze.** Elevated Plus Maze (Med Associates) has two open arms and two closed arms. Mice were placed in the hub of the maze and allowed to explore for five minutes. The time in each arm, as well as entrances to each arm, explorations, and head dips over the edge of the maze, were monitored by video tracking software (Med

Associates).

**Y Maze.** The Y-Maze apparatus consisted of three 15-inch long, 3.5-inch wide and 5-inch high arms made of white opaque plexiglass placed on a table. Each mouse was placed into the hub and allowed to freely explore for 6 minutes, with video recording. An entry was defined as the center of mouse body extending 2 inches into an arm, using tracking software (CleverSys). The chronological order of entries into respective arms was determined. Each time the mouse entered all three arms successively (e.g. A-B-C or A-C-B) was considered a set. Percent alternation was calculated by dividing the number of sets by the total number of entries minus two (since the first two entries cannot meet criteria for a set). Mice with 12 or fewer total entries were excluded from spontaneous alternation calculations due to insufficient sample size.

**Tube Test for Social Dominance.** The tube test for social dominance was conducted as previously described [31]. Mice of the same sex, but opposite genotype, were released into opposite ends of a clear plastic tube and allowed to freely interact. Under these conditions, one mouse will force the other out of the tube. The first mouse with two feet out of the tube was considered to have lost the match. Each mouse was paired with three different opponents of the opposite genotype, and the winning percentage was calculated for each mouse by dividing the number of wins by the total number of matches.

**Three-Chamber Sociability Test.** The three-chamber sociability test was conducted as previously described [32]. Mice were allowed to freely explore a three-chambered testing apparatus for 10 min prior the introduction of wire cages containing a novel mouse (adult sex-matched C57Bl/6J) or a novel object (Lego block). Investigation of the novel mouse and object was then monitored for 10 min using video tracking software (CleverSys).

**Scn1a and Scn8a in Developing Mouse Brain.** Publicly available RNA-seq data (SRA Accession # SRP055008) [40] was used to check the expression of *Scn1a* and *Scn8a* in the developing mouse cortex. The RNA-seq reads were trimmed using Trim Galore (<https://github.com/FelixKrueger/TrimGalore>). The trimmed reads were aligned to the mouse genome build GRCm38.p6 using STAR aligner. HTSeq was used to generate counts for genes from the alignments. *Scn1a* and *Scn8a* counts were extracted from the normalized table of counts in R package DESeq2. To calculate the proportion of 20N containing transcripts, samtools depth was used to extract coverage across each base of each exon of *Scn1a* and *Scn8a* [52]. The average read count per base was calculated by dividing the total read count by the size in bp of the exons. The averages for the 20N exon and all the exons were calculated separately. After normalizing to the number of mapped reads in each sample, percent poison exon usage was calculated using the formula: (average depth

of coverage of the poison exon) / (average depth of coverage of all exons) \*100.

**Statistics.** mRNA and protein levels were analyzed by Student's *t*-test. Behavioral tests were analyzed by Student's *t*-test or two-way RM-ANOVA specified in the figures dependent on the outcome measure. The survival data were analyzed by Kaplan-Meier statistics and post-hoc Log-rank (Mantel-Cox) test.

Two-tailed *p*-values were calculated for all analyses, and the cut-off for statistical significance was set at 0.05. GraphPad Prism 7 was used for all analyses. Data are presented as mean ± SEM (Standard Error of the Mean). Significance denoted as \**p*<0.05, \*\**p*<0.01, \*\*\**p*<0.001, \*\*\*\**p*<0.0001.

## Acknowledgements

Services obtained from the UAB Transgenic & Genetically Engineered Model Systems Core Facility (RAK) in this publication are supported by awards NIH P30 CA13148, P30 AR048311, P30 DK074038, P30 DK05336, P60 DK079626, U01HG007301, and R01MH110472. We thank Brian Roberts and Sarah Strange for preparing the Lexogen 3' RNA-seq libraries. We thank Rachael Vollmer for help maintaining the mouse colony and Shreya Kashyap for technical assistance using tube test behavioral analysis. This work was supported by the Evelyn F. McKnight Brain Institute.

## References

1. Wu YW, Sullivan J, McDaniel SS, Meisler MH, Walsh EM, Li SX, et al. Incidence of Dravet Syndrome in a US Population. *PEDIATRICS*. 2015;136(5):e1310-e5. doi: 10.1542/peds.2015-1807.
2. Carvill GL, Engel KL, Ramamurthy A, Cochran JN, Roovers J, Stamberger H, et al. Aberrant Inclusion of a Poison Exon Causes Dravet Syndrome and Related SCN1A-Associated Genetic Epilepsies. *The American Journal of Human Genetics*. 2018;103(6):1022-9. doi: 10.1016/j.ajhg.2018.10.023.
3. Wirrell EC, Laux L, Donner E, Jette N, Knupp K, Meskis MA, et al. Optimizing the Diagnosis and Management of Dravet Syndrome: Recommendations From a North American Consensus Panel. *Pediatric Neurology*. 2017;68:18-34.e3. doi: 10.1016/j.pediatrneurol.2017.01.025.
4. Shmuelly S, Sisodiya SM, Gunning WB, Sander JW, Thijs RD. Mortality in Dravet syndrome: A review. *Epilepsy & Behavior*. 2016;64:69-74. doi: 10.1016/j.yebeh.2016.09.007.
5. Bender AC, Morse RP, Scott RC, Holmes GL, Lenck-Santini P-P. SCN1A mutations in Dravet syndrome: impact of interneuron dysfunction on neural networks and cognitive outcome. *Epilepsy & behavior : E&B*. 2012;23(3):177-86. Epub 2012/02/16. doi: 10.1016/j.yebeh.2011.11.022. PubMed PMID: 22341965.
6. Lopez-Santiago L, Isom LL. Dravet Syndrome: A Developmental and Epileptic Encephalopathy. *Epilepsy Curr*. 2019;19(1):51-3. Epub 2019/03/07. doi: 10.1177/1535759718822038. PubMed PMID: 30838929; PubMed Central PMCID: PMC6610375.
7. Carvill GL, Weckhuysen S, McMahon JM, Hartmann C, Moller RS, Hjalgrim H, et al. GABRA1 and STXBP1: novel genetic causes of Dravet syndrome. *Neurology*. 2014;82(14):1245-53. Epub 2014/03/14. doi: 10.1212/wnl.0000000000000291. PubMed PMID: 24623842; PubMed Central PMCID: PMC4001207.
8. Oh Y, Waxman SG. Novel splice variants of the voltage-sensitive sodium channel alpha subunit. *Neuroreport*. 1998;9(7):1267-72. Epub 1998/06/19. doi: 10.1097/00001756-199805110-00002. PubMed PMID: 9631410.
9. Sander JD, Joung JK. CRISPR-Cas systems for editing, regulating and targeting genomes. *Nat Biotechnol*. 2014;32(4):347-55. Epub 2014/03/04. doi: 10.1038/nbt.2842. PubMed PMID: 24584096; PubMed Central PMCID: PMC4022601.
10. Miller AR, Hawkins NA, McCollom CE, Kearney JA. Mapping genetic modifiers of survival in a mouse model of Dravet syndrome. *Genes Brain Behav*. 2014;13(2):163-72. Epub 2013/10/25. doi: 10.1111/gbb.12099. PubMed PMID: 24152123; PubMed Central PMCID: PMC3930200.
11. Yu FH, Mantegazza M, Westenbroek RE, Robbins CA, Kalume F, Burton KA, et al. Reduced sodium current in GABAergic interneurons in a mouse model of severe myoclonic epilepsy in infancy. *Nat Neurosci*. 2006;9(9):1142-9. Epub 2006/08/22. doi: 10.1038/nn1754. PubMed PMID: 16921370.
12. Ogiwara I, Miyamoto H, Morita N, Atapour N, Mazaki E, Inoue I, et al. Nav1.1 localizes to axons of parvalbumin-positive inhibitory interneurons: a circuit basis for epileptic seizures in mice carrying an *Scn1a* gene mutation. *J Neurosci*. 2007;27(22):5903-14. Epub 2007/06/01. doi: 10.1523/JNEUROSCI.5270-06.2007. PubMed PMID: 17537961.
13. Martin MS, Dutt K, Papale LA, Dube CM, Dutton SB, de Haan G, et al. Altered function of the SCN1A voltage-gated sodium channel leads to gamma-aminobutyric acid-ergic (GABAergic) interneuron abnormalities. *The Journal of biological chemistry*. 2010;285(13):9823-34. Epub 2010/01/27. doi: 10.1074/jbc.M109.078568. PubMed PMID: 20100831; PubMed Central PMCID: PMC2843231.
14. Tsai MS, Lee ML, Chang CY, Fan HH, Yu IS, Chen YT, et al. Functional and structural deficits of the dentate gyrus network coincide with emerging spontaneous seizures in an *Scn1a* mutant Dravet Syndrome model during development. *Neurobiology of disease*. 2015;77:35-48. Epub 2015/03/01. doi: 10.1016/j.nbd.2015.02.010. PubMed PMID: 25725421.

15. Tang B, Dutt K, Papale L, Rusconi R, Shankar A, Hunter J, et al. A BAC transgenic mouse model reveals neuron subtype-specific effects of a Generalized Epilepsy with Febrile Seizures Plus (GEFS+) mutation. *Neurobiology of disease*. 2009;35(1):91-102. Epub 2009/05/05. doi: 10.1016/j.nbd.2009.04.007. PubMed PMID: 19409490; PubMed Central PMCID: PMCPMC2735447.
16. Shmuelly S, Sisodiya SM, Gunning WB, Sander JW, Thijs RD. Mortality in Dravet syndrome: A review. *Epilepsy & behavior : E&B*. 2016;64(Pt A):69-74. Epub 2016/10/13. doi: 10.1016/j.yebeh.2016.09.007. PubMed PMID: 27732919.
17. Ogiwara I, Iwasato T, Miyamoto H, Iwata R, Yamagata T, Mazaki E, et al. Nav1.1 haploinsufficiency in excitatory neurons ameliorates seizure-associated sudden death in a mouse model of Dravet syndrome. *Hum Mol Genet*. 2013;22(23):4784-804. Epub 2013/08/08. doi: 10.1093/hmg/ddt331. PubMed PMID: 23922229; PubMed Central PMCID: PMCPMC3820136.
18. Mistry AM, Thompson CH, Miller AR, Vanoye CG, George AL, Jr., Kearney JA. Strain- and age-dependent hippocampal neuron sodium currents correlate with epilepsy severity in Dravet syndrome mice. *Neurobiology of disease*. 2014;65:1-11. Epub 2014/01/18. doi: 10.1016/j.nbd.2014.01.006. PubMed PMID: 24434335; PubMed Central PMCID: PMCPMC3968814.
19. Cheah CS, Yu FH, Westenbroek RE, Kalume FK, Oakley JC, Potter GB, et al. Specific deletion of Nav1.1 sodium channels in inhibitory interneurons causes seizures and premature death in a mouse model of Dravet syndrome. *Proceedings of the National Academy of Sciences of the United States of America*. 2012;109(36):14646-51. Epub 2012/08/22. doi: 10.1073/pnas.1211591109. PubMed PMID: 22908258; PubMed Central PMCID: PMCPMC3437823.
20. Auerbach DS, Jones J, Clawson BC, Offord J, Lenk GM, Ogiwara I, et al. Altered cardiac electrophysiology and SUDEP in a model of Dravet syndrome. *PloS one*. 2013;8(10):e77843. Epub 2013/10/25. doi: 10.1371/journal.pone.0077843. PubMed PMID: 24155976; PubMed Central PMCID: PMCPMC3796479.
21. Kalume F, Westenbroek RE, Cheah CS, Yu FH, Oakley JC, Scheuer T, et al. Sudden unexpected death in a mouse model of Dravet syndrome. *The Journal of clinical investigation*. 2013;123(4):1798-808. Epub 2013/03/26. doi: 10.1172/jci66220. PubMed PMID: 23524966; PubMed Central PMCID: PMCPMC3613924.
22. Seibenhener ML, Wooten MC. Use of the Open Field Maze to measure locomotor and anxiety-like behavior in mice. *Journal of visualized experiments : JoVE*. 2015;(96):e52434-e. doi: 10.3791/52434. PubMed PMID: 25742564.
23. Bortolato M, Godar SC, Davarian S, Chen K, Shih JC. Behavioral disinhibition and reduced anxiety-like behaviors in monoamine oxidase B-deficient mice. *Neuropsychopharmacology : official publication of the American College of Neuropsychopharmacology*. 2009;34(13):2746-57. Epub 2009/08/26. doi: 10.1038/npp.2009.118. PubMed PMID: 19710633.
24. Roberson ED, Scearce-Levie K, Palop JJ, Yan F, Cheng IH, Wu T, et al. Reducing endogenous tau ameliorates amyloid  $\beta$ -induced deficits in an Alzheimer's disease mouse model. *Science*. 2007;316(5825):750-4. PubMed PMID: 17478722.
25. Hall AM, Throesch BT, Buckingham SC, Markwardt SJ, Peng Y, Wang Q, et al. Tau-dependent Kv4.2 depletion and dendritic hyperexcitability in a mouse model of Alzheimer's disease. *J Neurosci*. 2015;35(15):6221-30. doi: 10.1523/JNEUROSCI.2552-14.2015. PubMed PMID: 25878292.
26. Ito S, Ogiwara I, Yamada K, Miyamoto H, Hensch TK, Osawa M, et al. Mouse with Nav1.1 haploinsufficiency, a model for Dravet syndrome, exhibits lowered sociability and learning impairment. *Neurobiology of disease*. 2013;49:29-40. Epub 2012/09/19. doi: 10.1016/j.nbd.2012.08.003. PubMed PMID: 22986304.
27. Han S, Yu FH, Schwartz MD, Linton JD, Bosma MM, Hurley JB, et al. Na(V)1.1 channels are critical for intercellular communication in the suprachiasmatic nucleus and for normal circadian rhythms. *Proceedings of the National Academy of Sciences of the United States of America*. 2012;109(6):E368-77. Epub 2012/01/10. doi: 10.1073/pnas.1115729109. PubMed PMID: 22223655; PubMed Central PMCID: PMCPMC3277539.
28. Griffin A, Hamling KR, Hong S, Anvar M, Lee LP, Baraban SC. Preclinical Animal Models for Dravet Syndrome: Seizure Phenotypes, Comorbidities and Drug Screening. *Frontiers in Pharmacology*. 2018;9:573.
29. Walf AA, Frye CA. The use of the elevated plus maze as an assay of anxiety-related behavior in rodents. *Nature protocols*. 2007;2(2):322-8. doi: 10.1038/nprot.2007.44. PubMed PMID: 17406592.
30. Kraeuter AK, Guest PC, Sarnyai Z. The Y-Maze for Assessment of Spatial Working and Reference Memory in Mice. *Methods Mol Biol*. 2019;1916:105-11. Epub 2018/12/12. doi: 10.1007/978-1-4939-8994-2\_10. PubMed PMID: 30535688.
31. Arrant AE, Filiano AJ, Warmus BA, Hall AM, Roberson ED. Progranulin haploinsufficiency causes biphasic social dominance abnormalities in the tube test. *Genes Brain Behav*. 2016;15(6):588-603. doi: 10.1111/gbb.12300. PubMed PMID: 27213486.
32. Filiano AJ, Martens LH, Young AH, Warmus BA, Zhou P, Diaz-Ramirez G, et al. Dissociation of frontotemporal dementia-related deficits and neuroinflammation in progranulin haploinsufficient mice. *J Neurosci*. 2013;33(12):5352-61. Epub 2013/03/22. doi: 10.1523/JNEUROSCI.6103-11.2013. PubMed PMID: 23516300; PubMed Central PMCID: PMCPMC3740510.

33. Felts PA, Yokoyama S, Dib-Hajj S, Black JA, Waxman SG. Sodium channel alpha-subunit mRNAs I, II, III, NaG, Na6 and hNE (PN1): different expression patterns in developing rat nervous system. *Brain Res Mol Brain Res*. 1997;45(1):71-82. Epub 1997/04/01. doi: 10.1016/s0169-328x(96)00241-0. PubMed PMID: 9105672.
34. Beckh S, Noda M, Lubbert H, Numa S. Differential regulation of three sodium channel messenger RNAs in the rat central nervous system during development. *Embo j*. 1989;8(12):3611-6. Epub 1989/12/01. PubMed PMID: 2555170; PubMed Central PMCID: PMCPMC402042.
35. Cheah CS, Westenbroek RE, Roden WH, Kalume F, Oakley JC, Jansen LA, et al. Correlations in timing of sodium channel expression, epilepsy, and sudden death in Dravet syndrome. *Channels (Austin)*. 2013;7(6):468-72. Epub 2013/08/21. doi: 10.4161/chan.26023. PubMed PMID: 23965409.
36. Haufe V, Camacho JA, Dumaine R, Günther B, Bollensdorff C, Von Banchet GS, et al. Expression pattern of neuronal and skeletal muscle voltage-gated Na<sup>+</sup> channels in the developing mouse heart. *The Journal of Physiology*. 2005;564(3):683-96. doi: 10.1113/jphysiol.2004.079681.
37. Plummer NW, McBurney MW, Meisler MH. Alternative splicing of the sodium channel SCN8A predicts a truncated two-domain protein in fetal brain and non-neuronal cells. *J Biol Chem*. 1997;272(38):24008-15. Epub 1997/09/20. doi: 10.1074/jbc.272.38.24008. PubMed PMID: 9295353.
38. Howell VM, Jones JM, Bergren SK, Li L, Billi AC, Avenarius MR, et al. Evidence for a direct role of the disease modifier SCNM1 in splicing. *Hum Mol Genet*. 2007;16(20):2506-16. Epub 2007/07/28. doi: 10.1093/hmg/ddm206. PubMed PMID: 17656373.
39. O'Brien JE, Drews VL, Jones JM, Dugas JC, Barres BA, Meisler MH. Rbfox proteins regulate alternative splicing of neuronal sodium channel SCN8A. *Mol Cell Neurosci*. 2012;49(2):120-6. Epub 2011/11/03. doi: 10.1016/j.mcn.2011.10.005. PubMed PMID: 22044765; PubMed Central PMCID: PMCPMC3278527.
40. Yan Q, Weyn-Vanhentenryck SM, Wu J, Sloan SA, Zhang Y, Chen K, et al. Systematic discovery of regulated and conserved alternative exons in the mammalian brain reveals NMD modulating chromatin regulators. *Proceedings of the National Academy of Sciences*. 2015;112(11):3445. doi: 10.1073/pnas.1502849112.
41. Escayg A, Goldin AL. Sodium channel SCN1A and epilepsy: mutations and mechanisms. *Epilepsia*. 2010;51(9):1650-8. doi: 10.1111/j.1528-1167.2010.02640.x. PubMed PMID: 20831750.
42. Palombo R, Verdile V, Paronetto MP. Poison-Exon Inclusion in DHX9 Reduces Its Expression and Sensitizes Ewing Sarcoma Cells to Chemotherapeutic Treatment. *Cells*. 2020;9(2):328. doi: 10.3390/cells9020328. PubMed PMID: 32023846.
43. Wadman M. Updated: FDA approves drug that rescues babies with fatal neurodegenerative disease. *Science*. 2016. doi: doi:10.1126/science.aal0476.
44. Yin T, Cook D, Lawrence M. ggbio: an R package for extending the grammar of graphics for genomic data. *Genome Biol*. 2012;13(8):R77. Epub 2012/09/04. doi: 10.1186/gb-2012-13-8-r77. PubMed PMID: 22937822; PubMed Central PMCID: PMCPMC4053745.
45. R Core Team. R: A language and environment for statistical computing. R Foundation for Statistical Computing, Vienna, Austria. . 2019.
46. Rosenbloom KR, Armstrong J, Barber GP, Casper J, Clawson H, Diekhans M, et al. The UCSC Genome Browser database: 2015 update. *Nucleic Acids Res*. 2015;43(Database issue):D670-81. Epub 2014/11/28. doi: 10.1093/nar/gku1177. PubMed PMID: 25428374; PubMed Central PMCID: PMCPMC4383971.
47. Davydov EV, Goode DL, Sirota M, Cooper GM, Sidow A, Batzoglou S. Identifying a high fraction of the human genome to be under selective constraint using GERP++. *PLoS Comput Biol*. 2010;6(12):e1001025. Epub 2010/12/15. doi: 10.1371/journal.pcbi.1001025. PubMed PMID: 21152010; PubMed Central PMCID: PMCPMC2996323.
48. Waterhouse AM, Procter JB, Martin DM, Clamp M, Barton GJ. Jalview Version 2--a multiple sequence alignment editor and analysis workbench. *Bioinformatics*. 2009;25(9):1189-91. Epub 2009/01/20. doi: 10.1093/bioinformatics/btp033. PubMed PMID: 19151095; PubMed Central PMCID: PMCPMC2672624.
49. Dobin A, Davis CA, Schlesinger F, Drenkow J, Zaleski C, Jha S, et al. STAR: ultrafast universal RNA-seq aligner. *Bioinformatics (Oxford, England)*. 2013;29(1):15-21. Epub 2012/10/25. doi: 10.1093/bioinformatics/bts635. PubMed PMID: 23104886.
50. Anders S, Pyl PT, Huber W. HTSeq--a Python framework to work with high-throughput sequencing data. *Bioinformatics*. 2015;31(2):166-9. Epub 2014/09/28. doi: 10.1093/bioinformatics/btu638. PubMed PMID: 25260700; PubMed Central PMCID: PMCPMC4287950.
51. Love MI, Huber W, Anders S. Moderated estimation of fold change and dispersion for RNA-seq data with DESeq2. *Genome Biol*. 2014;15(12):550. Epub 2014/12/18. doi: 10.1186/s13059-014-0550-8. PubMed PMID: 25516281; PubMed Central PMCID: PMCPMC4302049.
52. Li H, Handsaker B, Wysoker A, Fennell T, Ruan J, Homer N, et al. The Sequence Alignment/Map format and SAMtools. *Bioinformatics*. 2009;25(16):2078-9. Epub 2009/06/10. doi: 10.1093/bioinformatics/btp352. PubMed PMID: 19505943; PubMed Central PMCID: PMCPMC2723002.

## Supplemental Figures

Human GATAATCTTGCTCCAACCTGGATGGGTTGGAGCGCTGGTTCCTCCCC-TGAGCCCTTTATTATGG  
 Chimpanzee GATAATCTTGCTCCAACCTGGATGGGTTGGAGCGCTGGTTCCTCCCC-TGAGCCCTTTATTATGG  
 Gorilla GATAATCTTGCTCCAACCTGGATGGGTTGGAGCGCTGGTTCCTCCCC-TGAGCCCTTTATTATGG  
 Orangutan GATAATCTTGCTCCAACCTGGATGGGTTGGAGCGCTGGTTCCTCCCC-TGAGCCCTTTATTATGG  
 White-Cheeked Gibbon GATAATCTTGCTCCAACCTGGATGGGTTGGAGCGCTGGTTCCTCCCC-TGAGCCCTTTATTATGG  
 Rhesus Monkey GATAATCTTGCTCCAACCTGGATGGGTTGGAGCGCTGGTTCCTCCCC-TGAGCCCTTTATTATGG  
 Crab-Eating Macaque GATAATCTTGCTCCAACCTGGATGGGTTGGAGCGCTGGTTCCTCCCC-TGAGCCCTTTATTATGG  
 Olive Baboon GATAATCTTGCTCCAACCTGGATGGGTTGGAGCGCTGGTTCCTCCCC-TGAGCCCTTTATTATGG  
 Green Monkey GATAATCTTGCTCCAACCTGGATGGGTTGGAGCGCTGGTTCCTCCCC-TGAGCCCTTTATTATGG  
 White-Tufted-Ear Marmoset GATAATCTTGCTCCAACCTGGATGGGTTGGAGCGCTGGTTCCTCCCC-TGAGCCCTTTATTATGG  
 Bolivian Squirrel Monkey GATAATCTTGCTCCAACCTGGATGGGTTGGAGCGCTGGTTCCTCCCC-TGAGCCCTTTATTATGG  
 Lesser Egyptian Jerboa GATAATCTTGCTCCAACCTGGATGGGTTGGAGCGCTGGTTCCTCCCC-TGAGCCCTTTATTATGG  
 Northern Greater Galago GATAATCTTGCTCCAACCTGGATGGGTTGGAGCGCTGGTTCCTCCCC-TGAGCCCTTTATTATGG  
 Chinese Tree Shrew GATAATCTTGCTCCAACCTGGATGGGTTGGAGCGCTGGTTCCTCCCC-TGAGCCCTTTATTATGG  
 Naked Mole Rat GATAATCTTGCTCCAACCTGGATGGGTTGGAGCGCTGGTTCCTCCCC-TGAGCCCTTTATTATGG  
 Chinchilla GATAATCTTGCTCCAACCTGGATGGGTTGGAGCGCTGGTTCCTCCCC-TGAGCCCTTTATTATGG  
 Brush-Tailed Rat GATAATCTTGCTCCAACCTGGATGGGTTGGAGCGCTGGTTCCTCCCC-TGAGCCCTTTATTATGG  
 Rabbit GATAATCTTGCTCCAACCTGGATGGGTTGGAGCGCTGGTTCCTCCCC-TGAGCCCTTTATTATGG  
 Pika GATAATCTTGCTCCAACCTGGATGGGTTGGAGCGCTGGTTCCTCCCC-TGAGCCCTTTATTATGG  
 Horse GATAATCTTGCTCCAACCTGGATGGGTTGGAGCGCTGGTTCCTCCCC-TGAGCCCTTTATTATGG  
 White Rhinoceros GATAATCTTGCTCCAACCTGGATGGGTTGGAGCGCTGGTTCCTCCCC-TGAGCCCTTTATTATGG  
 Cat GATAATCTTGCTCCAACCTGGATGGGTTGGAGCGCTGGTTCCTCCCC-TGAGCCCTTTATTATGG  
 Dog GATAATCTTGCTCCAACCTGGATGGGTTGGAGCGCTGGTTCCTCCCC-TGAGCCCTTTATTATGG  
 Ferret GATAATCTTGCTCCAACCTGGATGGGTTGGAGCGCTGGTTCCTCCCC-TGAGCCCTTTATTATGG  
 Panda GATAATCTTGCTCCAACCTGGATGGGTTGGAGCGCTGGTTCCTCCCC-TGAGCCCTTTATTATGG  
 Pacific Walrus GATAATCTTGCTCCAACCTGGATGGGTTGGAGCGCTGGTTCCTCCCC-TGAGCCCTTTATTATGG  
 Weddell Seal GATAATCTTGCTCCAACCTGGATGGGTTGGAGCGCTGGTTCCTCCCC-TGAGCCCTTTATTATGG  
 Black Flying Fox GATAATCTTGCTCCAACCTGGATGGGTTGGAGCGCTGGTTCCTCCCC-TGAGCCCTTTATTATGG  
 Megabat GATAATCTTGCTCCAACCTGGATGGGTTGGAGCGCTGGTTCCTCCCC-TGAGCCCTTTATTATGG  
 Big Brown Bat GATAATCTTGCTCCAACCTGGATGGGTTGGAGCGCTGGTTCCTCCCC-TGAGCCCTTTATTATGG  
 David's Myotis GATAATCTTGCTCCAACCTGGATGGGTTGGAGCGCTGGTTCCTCCCC-TGAGCCCTTTATTATGG  
 Microbat GATAATCTTGCTCCAACCTGGATGGGTTGGAGCGCTGGTTCCTCCCC-TGAGCCCTTTATTATGG  
 Hedgehog GATAATCTTGCTCCAACCTGGATGGGTTGGAGCGCTGGTTCCTCCCC-TGAGCCCTTTATTATGG  
 Guinea Pig GATAATCTTGCTCCAACCTGGATGGGTTGGAGCGCTGGTTCCTCCCC-TGAGCCCTTTATTATGG  
 Pig GATAATCTTGCTCCAACCTGGATGGGTTGGAGCGCTGGTTCCTCCCC-TGAGCCCTTTATTATGG  
 Alpaca GATAATCTTGCTCCAACCTGGATGGGTTGGAGCGCTGGTTCCTCCCC-TGAGCCCTTTATTATGG  
 Bactrian Camel GATAATCTTGCTCCAACCTGGATGGGTTGGAGCGCTGGTTCCTCCCC-TGAGCCCTTTATTATGG  
 Orca GATAATCTTGCTCCAACCTGGATGGGTTGGAGCGCTGGTTCCTCCCC-TGAGCCCTTTATTATGG  
 Tibetan Antelope GATAATCTTGCTCCAACCTGGATGGGTTGGAGCGCTGGTTCCTCCCC-TGAGCCCTTTATTATGG  
 Cow GATAATCTTGCTCCAACCTGGATGGGTTGGAGCGCTGGTTCCTCCCC-TGAGCCCTTTATTATGG  
 Sheep GATAATCTTGCTCCAACCTGGATGGGTTGGAGCGCTGGTTCCTCCCC-TGAGCCCTTTATTATGG  
 Domestic Goat GATAATCTTGCTCCAACCTGGATGGGTTGGAGCGCTGGTTCCTCCCC-TGAGCCCTTTATTATGG  
 Shrew GATAATCTTGCTCCAACCTGGATGGGTTGGAGCGCTGGTTCCTCCCC-TGAGCCCTTTATTATGG  
 Elephant GATAATCTTGCTCCAACCTGGATGGGTTGGAGCGCTGGTTCCTCCCC-TGAGCCCTTTATTATGG  
 Cape Elephant Shrew GATAATCTTGCTCCAACCTGGATGGGTTGGAGCGCTGGTTCCTCCCC-TGAGCCCTTTATTATGG  
 Manatee GATAATCTTGCTCCAACCTGGATGGGTTGGAGCGCTGGTTCCTCCCC-TGAGCCCTTTATTATGG  
 Aardvark GATAATCTTGCTCCAACCTGGATGGGTTGGAGCGCTGGTTCCTCCCC-TGAGCCCTTTATTATGG  
 Armadillo GATAATCTTGCTCCAACCTGGATGGGTTGGAGCGCTGGTTCCTCCCC-TGAGCCCTTTATTATGG  
 Platypus GATAATCTTGCTCCAACCTGGATGGGTTGGAGCGCTGGTTCCTCCCC-TGAGCCCTTTATTATGG  
 Prairie Vole GATAATCTTGCTCCAACCTGGATGGGTTGGAGCGCTGGTTCCTCCCC-TGAGCCCTTTATTATGG  
 Chinese Hamster GATAATCTTGCTCCAACCTGGATGGGTTGGAGCGCTGGTTCCTCCCC-TGAGCCCTTTATTATGG  
 Mouse GATAATCTTGCTCCAACCTGGATGGGTTGGAGCGCTGGTTCCTCCCC-TGAGCCCTTTATTATGG  
 Golden Hamster GATAATCTTGCTCCAACCTGGATGGGTTGGAGCGCTGGTTCCTCCCC-TGAGCCCTTTATTATGG  
 Star-Nosed Mole GATAATCTTGCTCCAACCTGGATGGGTTGGAGCGCTGGTTCCTCCCC-TGAGCCCTTTATTATGG  
 Squirrel GATAATCTTGCTCCAACCTGGATGGGTTGGAGCGCTGGTTCCTCCCC-TGAGCCCTTTATTATGG  
 Rat GATAATCTTGCTCCAACCTGGATGGGTTGGAGCGCTGGTTCCTCCCC-TGAGCCCTTTATTATGG  
 Opossum GATAATCTTGCTCCAACCTGGATGGGTTGGAGCGCTGGTTCCTCCCC-TGAGCCCTTTATTATGG  
 Tasmanian Devil GATAATCTTGCTCCAACCTGGATGGGTTGGAGCGCTGGTTCCTCCCC-TGAGCCCTTTATTATGG  
 Cape Golden Mole GATAATCTTGCTCCAACCTGGATGGGTTGGAGCGCTGGTTCCTCCCC-TGAGCCCTTTATTATGG  
 American Alligator GATAATCTTGCTCCAACCTGGATGGGTTGGAGCGCTGGTTCCTCCCC-TGAGCCCTTTATTATGG  
 Green Sea Turtle GATAATCTTGCTCCAACCTGGATGGGTTGGAGCGCTGGTTCCTCCCC-TGAGCCCTTTATTATGG  
 Tenrec GGTAATCTTGCTCCAACCTGGATGGGTTGGAGCGCTGGTTCCTCCCC-TGAGCCCTTTATTATGG  
 Painted Turtle GATAATCTTGCTCCAACCTGGATGGGTTGGAGCGCTGGTTCCTCCCC-TGAGCCCTTTATTATGG  
 Chinese Softshell Turtle GATAATCTTGCTCCAACCTGGATGGGTTGGAGCGCTGGTTCCTCCCC-TGAGCCCTTTATTATGG  
 Spiny Softshell Turtle GATAATCTTGCTCCAACCTGGATGGGTTGGAGCGCTGGTTCCTCCCC-TGAGCCCTTTATTATGG  
 Saker Falcon GATAACCTTTCTTCAAGCTGGATGGGTTGGAGCGCTGGTTCCTCCCC-TTA--CCTGATTATGG  
 Peregrine Falcon GATAACCTTTCTTCAAGCTGGATGGGTTGGAGCGCTGGTTCCTCCCC-TTA--CCTGATTATGG  
 Rock Pigeon GATAACCTTTCTTCAAGCTGGATGGGTTGGAGCGCTGGTTCCTCCCC-TTA--TCTGATTATGG  
 Puerto Rican Parrot GATAACCTTTCTTCAAGCTGGATGGGTTGGAGCGCTGGTTCCTCCCC-TTA--TCTGATTATGG  
 Scarlet Macaw GATAACCTTTCTTCAAGCTGGATGGGTTGGAGCGCTGGTTCCTCCCC-TTA--TCTGATTATGG  
 Budgerigar GATAACCTTTCTTCAAGCTGGATGGGTTGGAGCGCTGGTTCCTCCCC-TTA--TCTGATTATGG  
 Mallard Duck GATAACCTTTCTTCAAGCTGGATGGGTTGGAGCGCTGGTTCCTCCCC-TTA--TCTGATTATGG  
 Collared Flycatcher GATA---CATTTCAAGCTGGATGGGTTGGAGCGCTGGTTCCTCCCC-TTA--TCTGATTATGG  
 Zebra Finch GATA---CATTTCAAGCTGGATGGGTTGGAGCGCTGGTTCCTCCCC-TTA--CCTGATTATGG  
 Tibetan Ground Jay GATA---CATTTCAAGCTGGATGGGTTGGAGCGCTGGTTCCTCCCC-TTT--TCTGATTATGG  
 White-Throated Sparrow GATA---CGTTTCAAGCTGGATGGGTTGGAGCGCTGGTTCCTCCCC-TTA--CCTCTATTATGG  
 Medium Ground Finch GATA---CGTTTCAAGCTGGATGGGTTGGAGCGCTGGTTCCTCCCC-TTA--CCTCTATTATGG

**Figure S1. Multiple alignment of organisms with conservation in the *SCN1A* 20N region from the Multiz Alignment of 100 Vertebrates track from the UCSC Genome Browser.**

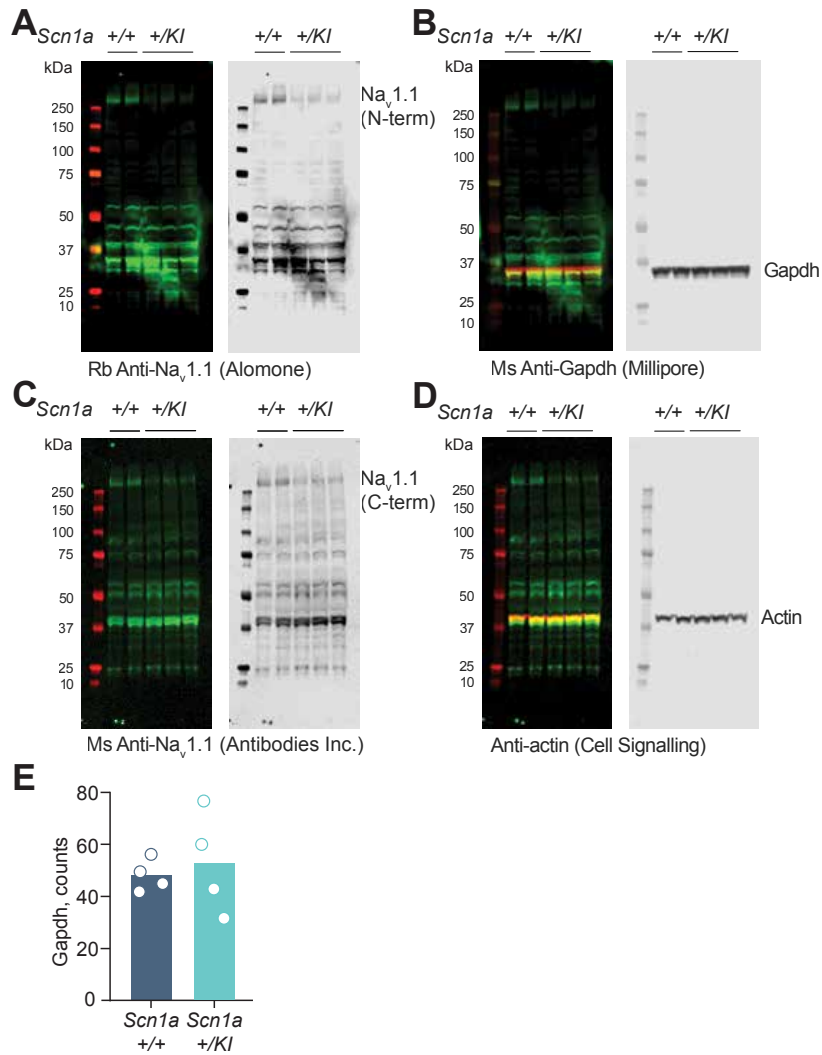

**Figure S2. Full length Western blots of protein levels in *Scn1a*  $+/KI$  and *Scn1a*  $+/+$  mouse brains.** (A) Brain (frontal lobe) *Scn1a* protein levels in *Scn1a*  $+/KI$  vs. *Scn1a*  $+/+$  mice using rabbit anti- $Na_v1.1$  (*Scn1a*) antibody from Alomone Labs. (B) GAPDH using anti-GAPDH antibody from Millipore was used as loading control. (C) *Scn1a* protein levels using anti- $Na_v1.1$  (*SCN1A*) UC-Davis antibody. (D) Actin using anti-Actin antibodies from Cell Signalling was used as loading control. (E) RNA-seq counts of *Gapdh* mRNA from DESeq2 analysis in whole brains of *Scn1a*  $+/KI$  and *Scn1a*  $+/+$  mice ( $n = 4$ ,  $11.64 \pm 2.90$  months, Student's unpaired t-test,  $p = 0.67$ ).

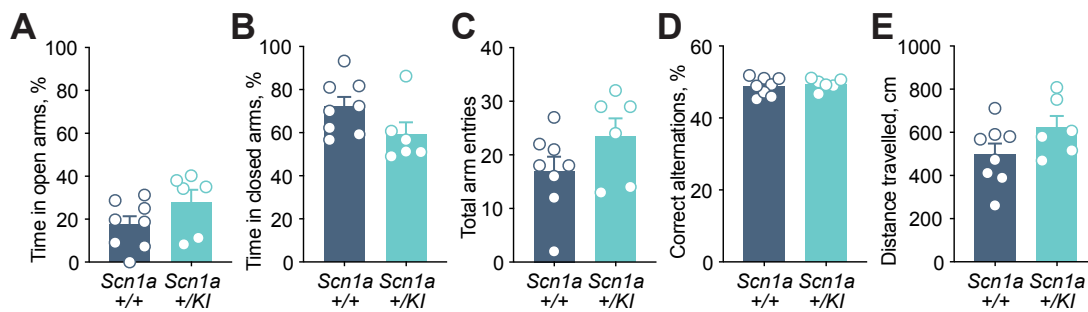

**Figure S3. *Scn1a*<sup>+/*KI*</sup> mice have no behavioral changes detected in the elevated plus and Y mazes.** (A) Time spent in open arms of the elevated plus maze ( $n = 6-8$ ,  $13.81 \pm 0.47$  months, Student's unpaired t-test,  $p = 0.1475$ ). (B) Time spent in closed arms of the elevated plus maze ( $n = 6-8$ ,  $13.81 \pm 0.47$  months, Student's unpaired t-test,  $p = 0.0958$ ). (C) Total arm entries of the elevated plus maze ( $n = 6-8$ ,  $13.81 \pm 0.47$  months, Student's unpaired t-test,  $p = 0.1577$ ). (D) Correct alternations in the Y maze ( $n = 6-8$ ,  $13.81 \pm 0.47$  months, Student's unpaired t-test,  $p = 0.5888$ ). (E) Total distance travelled during 5 min in the Y maze ( $n = 6-8$ ,  $13.81 \pm 0.47$  months, Student's unpaired t-test,  $p = 0.1242$ ). All data are expressed as mean  $\pm$  SEM.

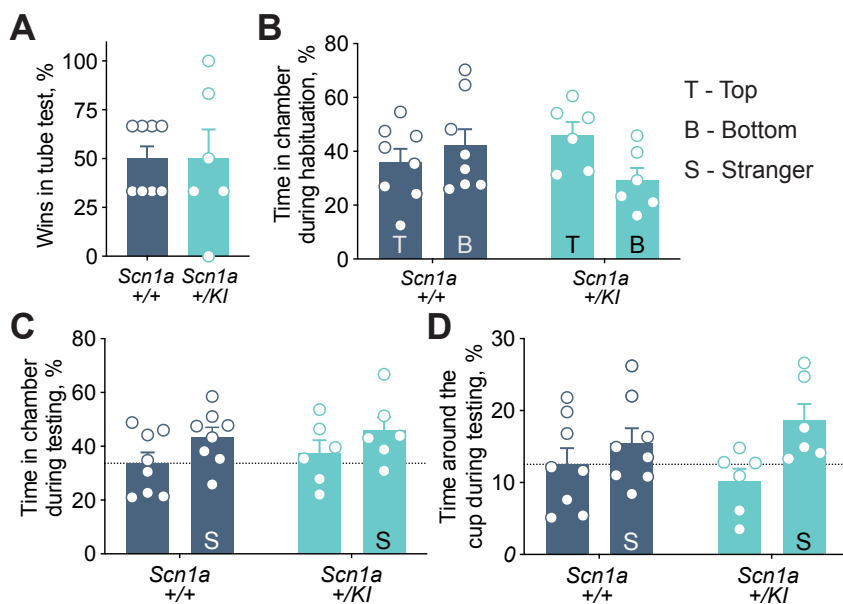

**Figure S4. *Scn1a*<sup>+/*KI*</sup> mice have no social behavior deficits detected.** (A) *Scn1a*<sup>+/*KI*</sup> mice win equally to the littermate *Scn1a*<sup>+/*+*</sup> mice in the social dominance tube test ( $n = 6-8$ ,  $13.81 \pm 0.47$  months, Student's unpaired t-test,  $p > 0.9999$ ). (B) During habituation, mice of both genotypes had no preference to the side (top or bottom) of the three-chamber box ( $n = 6-8$ ,  $13.81 \pm 0.47$  months, two-way RM-ANOVA, interaction  $p = 0.1484$ , main effect of side  $p = 0.04828$ , main effect of genotype  $p = 0.4806$ ). (C) During testing, mice of both genotypes had no preference to a Lego block or a stranger mouse (S) as measured by time spent in a specific chamber containing a Lego block or a stranger mouse ( $n = 6-8$ ,  $13.81 \pm 0.47$  months, two-way RM-ANOVA, interaction  $p = 0.08994$ , main effect of stranger mouse  $p = 0.1339$ , main effect of genotype  $p = 0.2311$ ). (D) *Scn1a*<sup>+/*KI*</sup> mice were not significantly different from *Scn1a*<sup>+/*+*</sup> litter-mate controls in time spent around a cup containing stranger mouse compared to time spent around a cup containing a Lego object ( $n = 6-8$ ,  $13.81 \pm 0.47$  months, two-way RM-ANOVA, interaction  $p = 0.1969$ , main effect of stranger mouse  $*p = 0.0167$ , main effect of genotype  $p = 0.0867$ ). All data are expressed as mean  $\pm$  SEM.
